# Supplementary material
Source: publisher site journal article supplement (https://www.dovepress.com/article/383161)
Supplement: Supplementary file 1 [file get_supplementary_file.php]

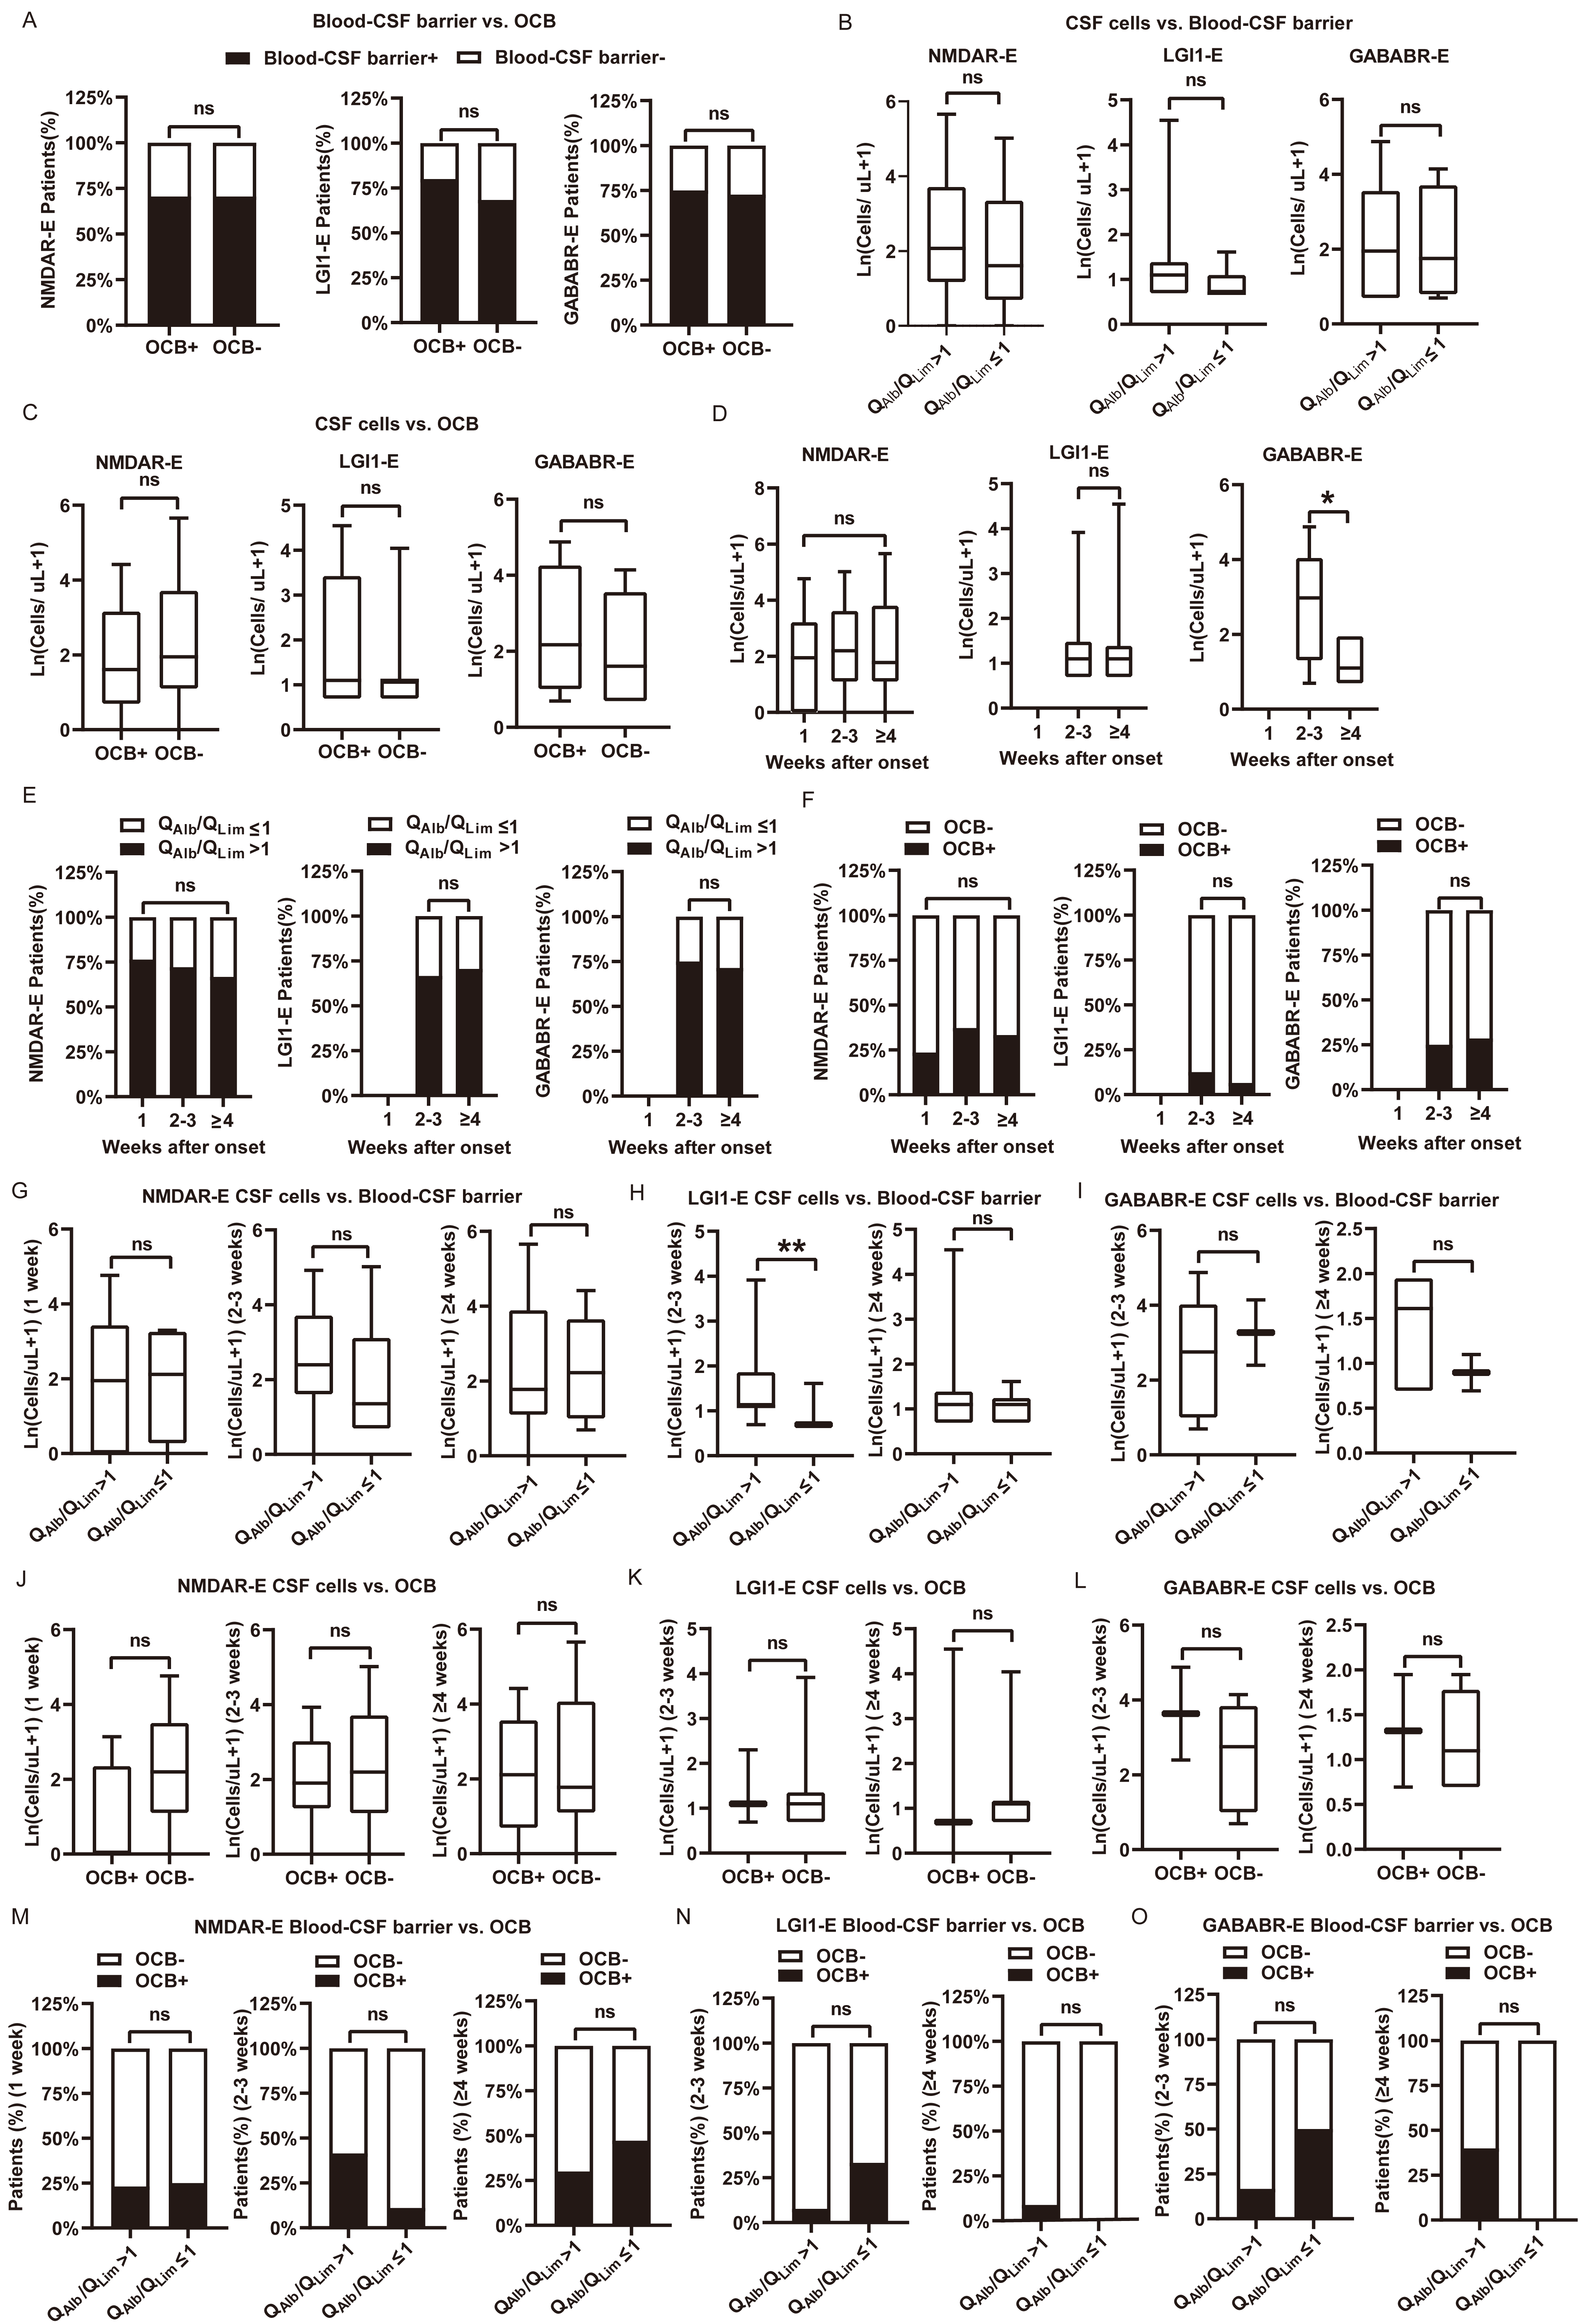


Figure S1. Correlation of CSF leukocyte count, age-adjusted QAlb, and CSF-restricted OCB with lumbar puncture time after onset of symptoms in NMDAR-E, LGI1-E, and GABABR-E. (A) NMDAR-E, LGI1-E, and GABABR-E patients were dichotomized according to the presence or absence of OCBs. The percentage of dysfunctional blood-CSF barrier as measured by QAlb/Qlim >1 was displayed. (B) The CSF leukocyte count logarithmized after adding the correction factor 1 (Ln(cells/μL+1)) was plotted against the age-adjusted QAlb (QAlb/Qlim) >1 and ≤1 in NMDAR-E, LGI1-E, and GABABR-E patients. (C) NMDAR-E, LGI1-E, and GABABR-E patients were dichotomized according to the presence or absence of OCBs. The CSF leukocyte count was represented as Ln(cells/μL+1). (D-F) Patients with NMDAR-E, LGI-E, and GABABR-E were categorized according to the latency between symptom onset and lumbar puncture (week 1 = day 0-6; weeks 2-3 = day 7-20; weeks 4 = day 21 and later). On display were the CSF leukocyte count, blood-CSF barrier dysfunction (QAlb/QLim), and the presence of OCB. (G-I) The CSF leukocyte count as (Ln(cells/μL+1) was plotted against QAlb/Qlim >1 and ≤1 in NMDAR-E, LGI1-E, and GABABR-E patients based on the delay of lumbar puncture after onset of symptoms (week 1, weeks 2-3, and weeks 4). (J-L) The NMDAR-E, LGI1-E, and GABABR-E patients were dichotomized according to the presence or absence of OCBs. The CSF leukocytes count as Ln(cells/μl+1) was displayed based on the lumbar puncture delay after symptom onset (week 1, weeks 2-3, and weeks 4). (M-O) The NMDAR-E, LGI1-E, and GABABR-E patients were dichotomized according to the presence or absence of OCBs. According to the delay in lumbar puncture after the onset of symptoms (week 1, weeks 2-3, and weeks 4), the percentage of blood-CSF barrier dysfunction (QAlb/Qlim >1) was displayed. NMDAR-E, anti-N-methyl-D-aspartate receptor encephalitis; LGI1-E, anti-leucine-rich glioma-inactivated 1 encephalitis; GABABR-E, anti-gamma aminobutyric acid-B receptor encephalitis; CSF, cerebrospinal fluid; OCBs, oligoclonal bands; ns, not significant statistical. *p < 0.05, and **p < 0.01.


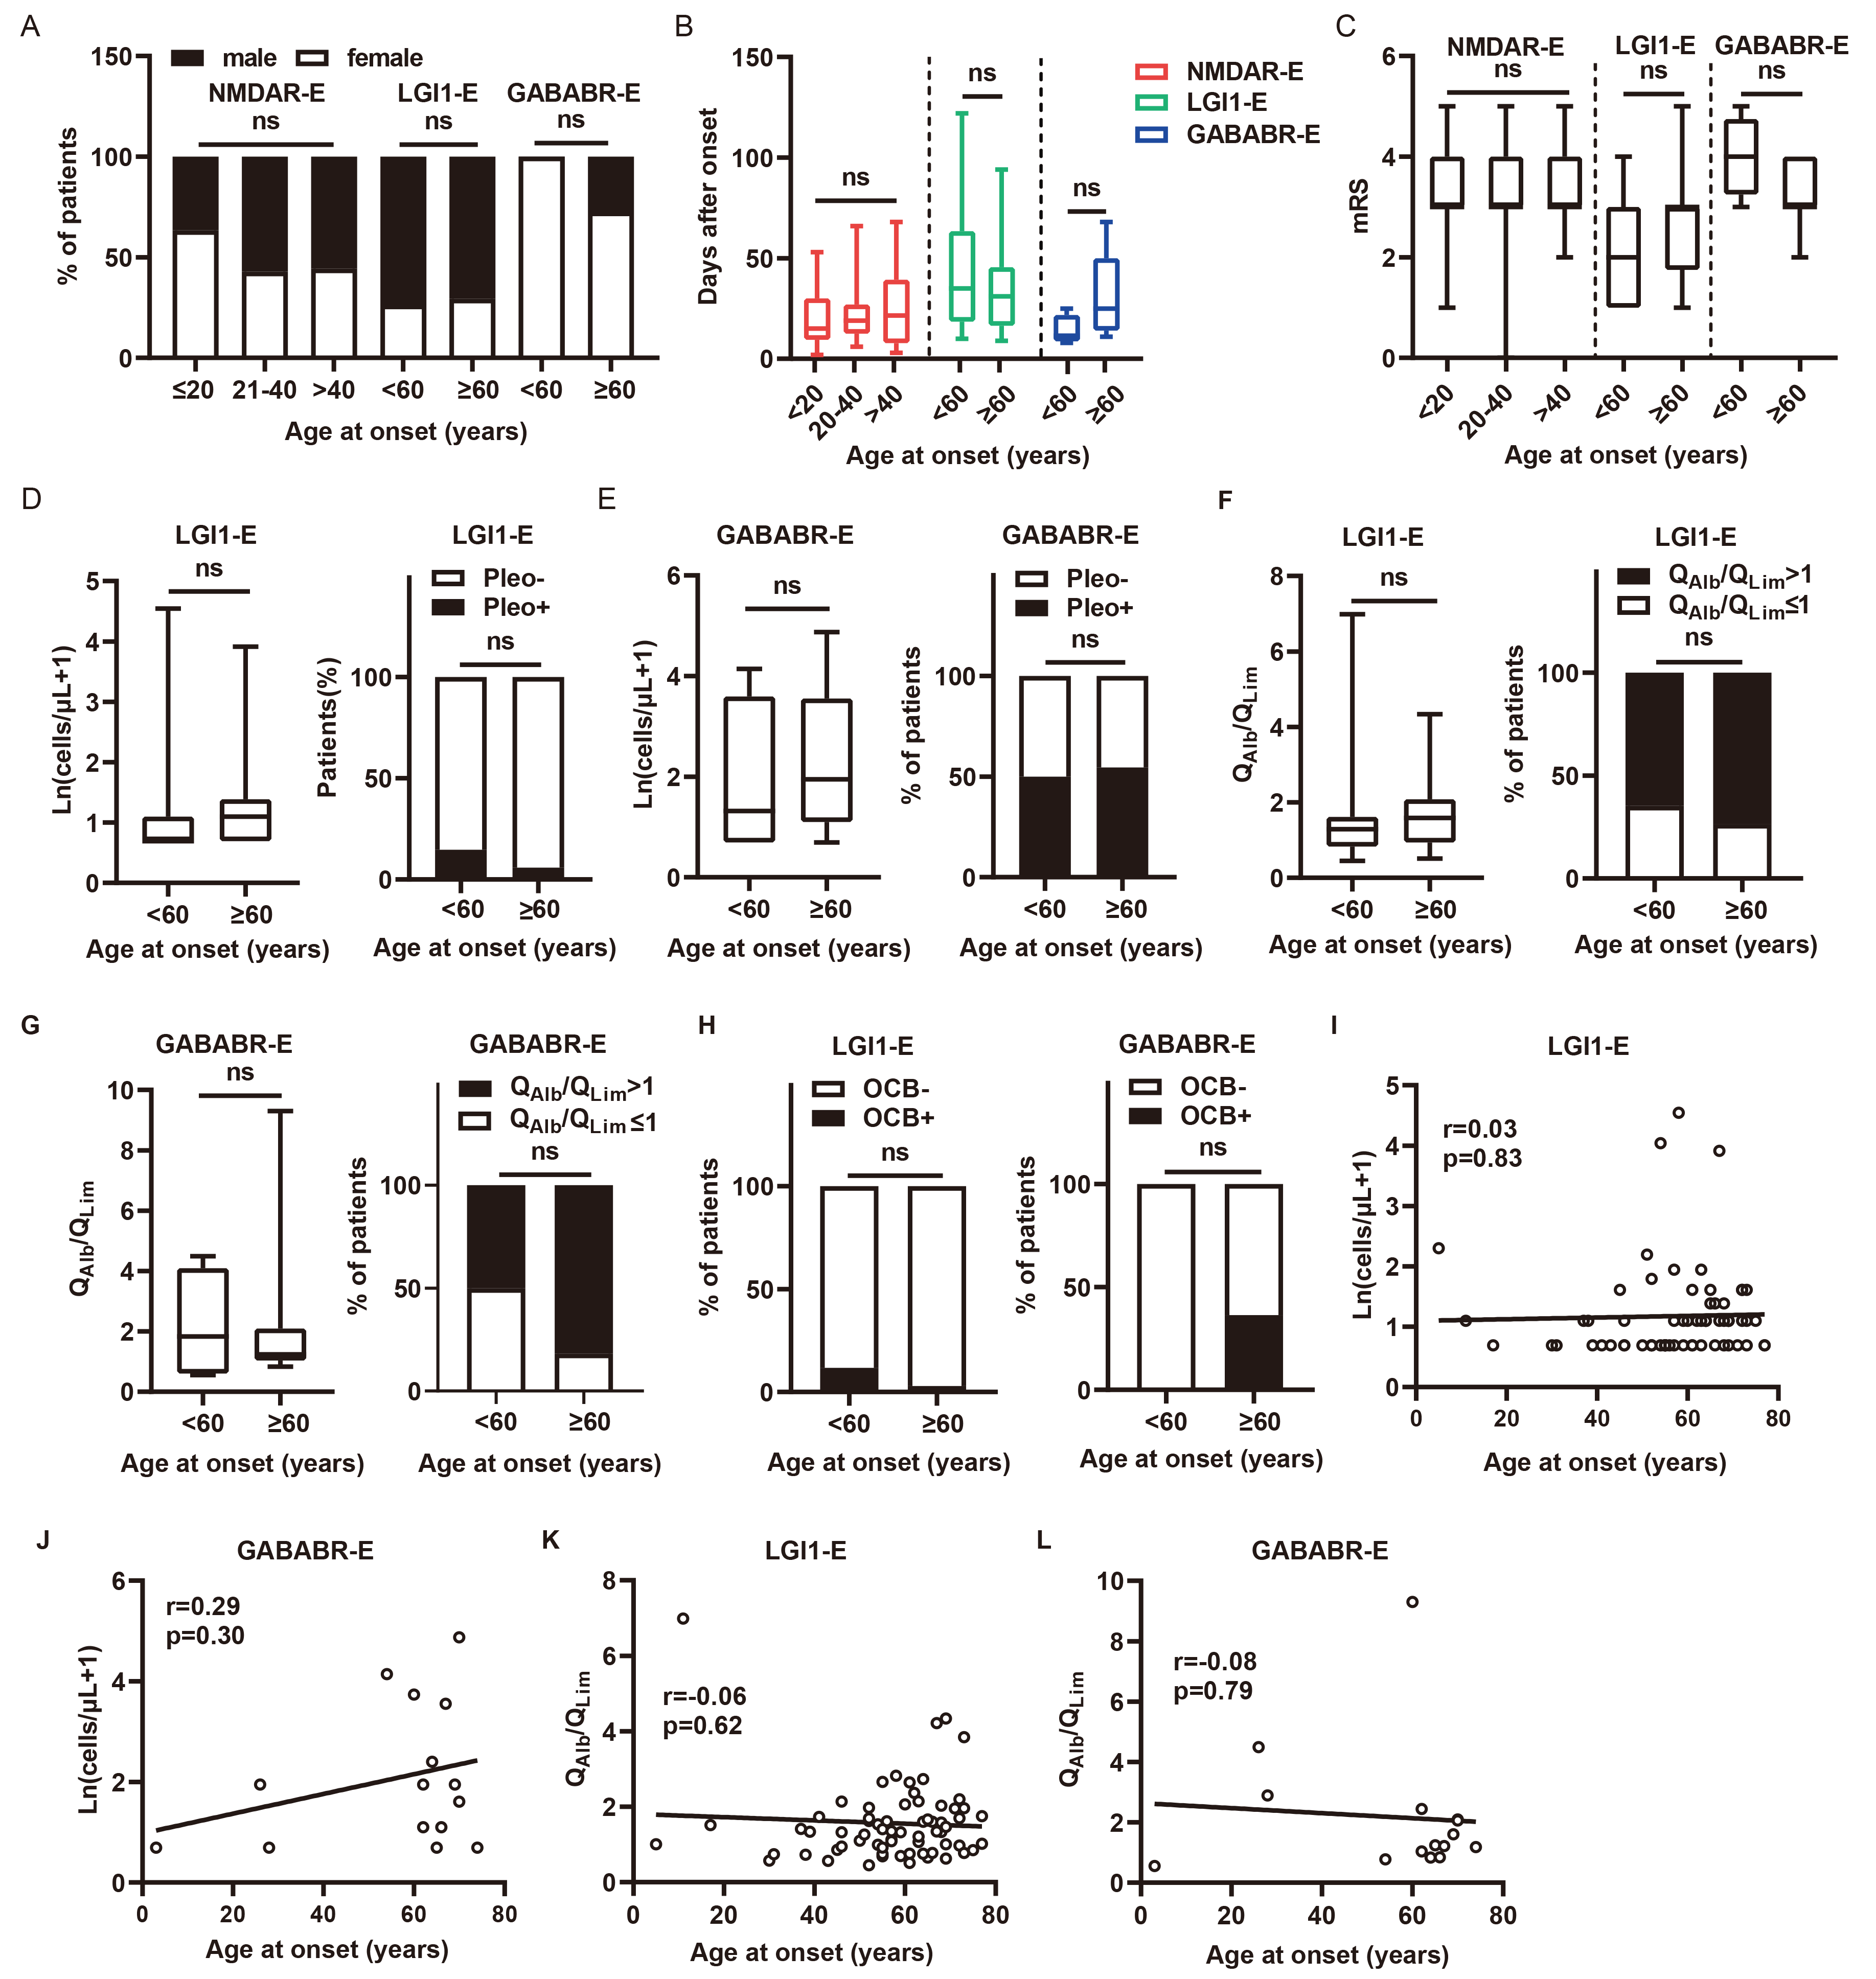


Figure S2: The effect of age at onset on CSF leukocyte count, blood-CSF barrier function, and OCB with CSF restriction in LGI1-E and GABABR-E. Sexual distribution (A), LP time after disease onset (B) and mRS on admission (C) in NMDAR-E patients with age <20, 20-40 and >40 years old, LGI1-E patients and GABABR-E patients with age <60 and ≥60 years old. Count of CSF leukocytes in LGI1-E (D) and GABABR-E patients (E) aged <60 and ≥60 years, respectively. Blood-CSF barrier dysfunction in LGI1-E (F) and GABABR-E patients (G) aged <60 and ≥60 years, respectively. (H) OCB frequency in patients with LGI1-E and GABABR-E with age <60 and ≥60 years old, respectively. (I) and (J) The association of age at onset with CSF leukocytes count in LGI1-E and GABABR-E. (K) and (L) The association of age at onset with age-adjust QAlb in LGI1-E and GABABR-E. LGI1-E, leucine-rich glioma inactivated protein-1 antibody encephalitis; GABABR-E, gamma aminobutyric acid-B receptor antibody encephalitis; QAlb, CSF/serum albumin ratio; ns, not significant statistical.


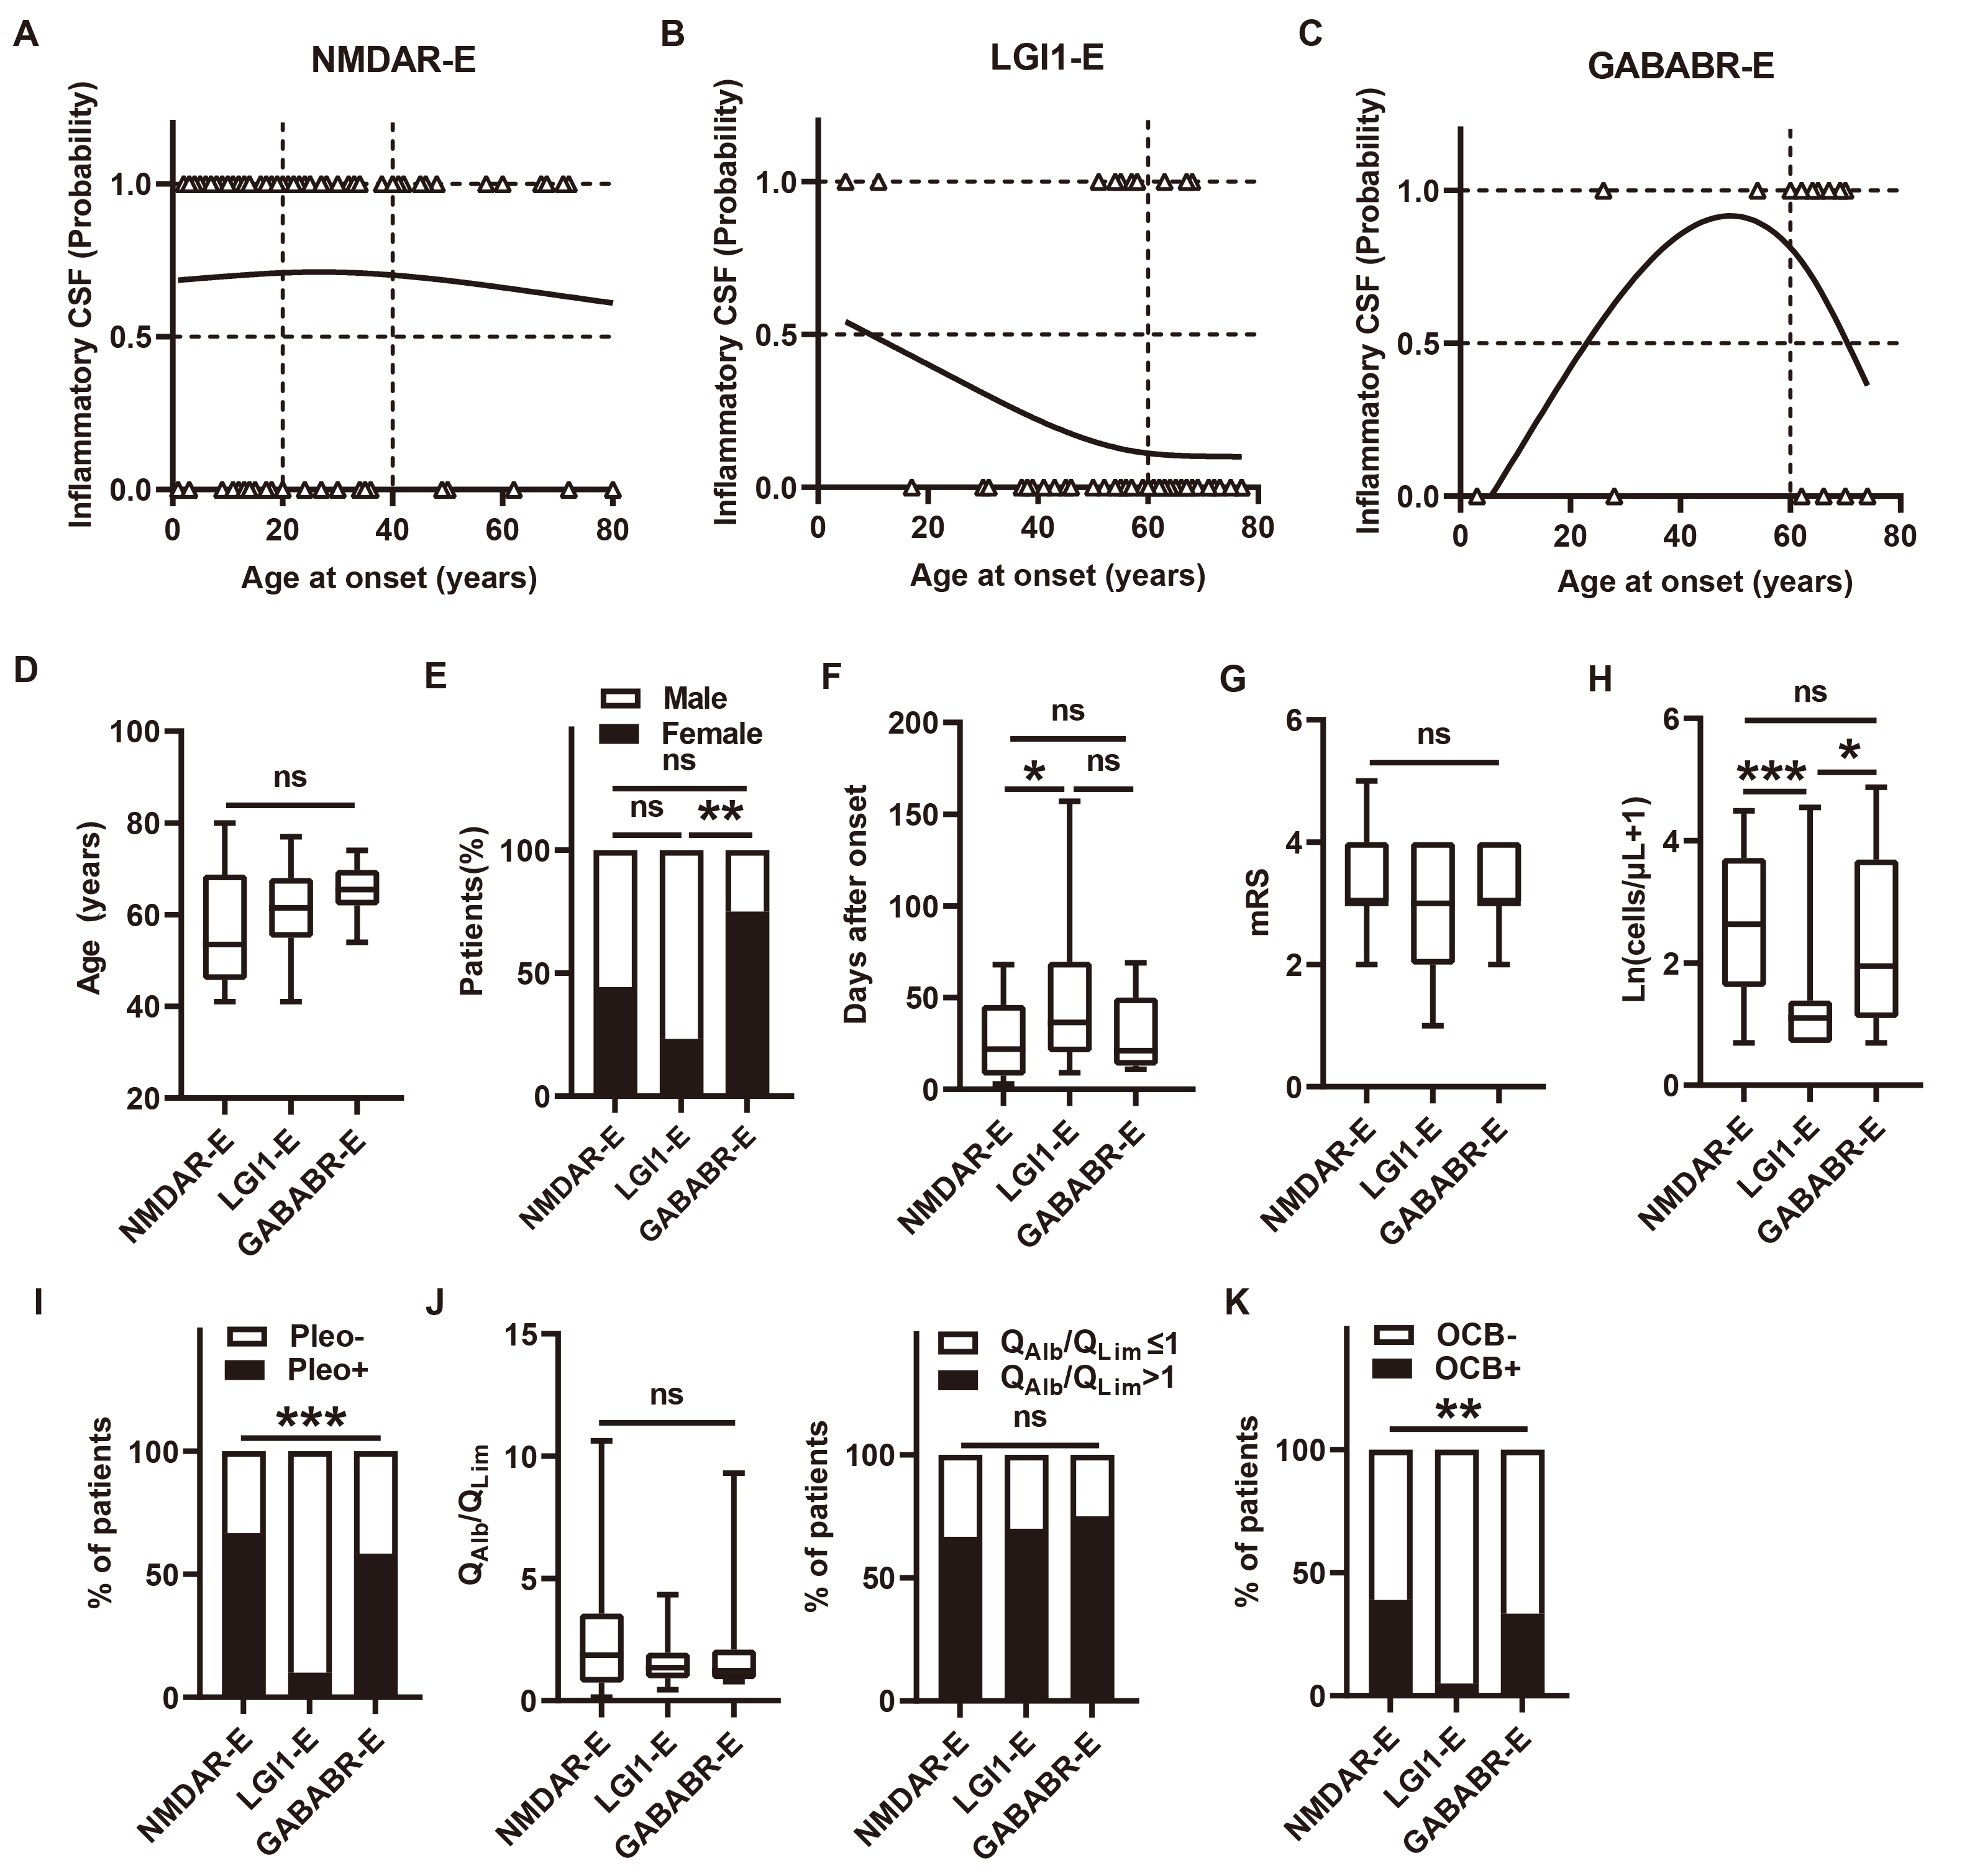


Figure S3: The analysis of CSF inflammatory parameters in the patients aged >40 years with NMDAR-E, LGI1-E, and GABABR-E. Age at onset was plotted against the inflammatory CSF status (0=No, 1=Yes) for NMDAR-E (A), LGI1-E (B), and GABABR-E (C). The age limits used to designate age groups are denoted by dashed lines. The likelihood of an inflammatory CSF change is indicated by the smoothed LOWESS lines. Age at onset (D), sexual distribution (E), LP time point after disease onset (F), and mRS on admission (G) for patients with NMDAR-E, LGI1-E, and GABABR-E mutations. (H) and (I) CSF leukocyte count in NMDAR-E, LGI1-E and GABABR-E patients. (J) Blood-CSF barrier dysfunction in the patients with NMDAR-E, LGI1-E and GABABR-E. (K) The frequency of OCB in patients with NMDAR-E, LGI1-E and GABABR-E. NMDAR-E, anti-N-methyl-D-aspartate receptor encephalitis; LGI1-E, anti-leucine-rich glioma-inactivated 1 encephalitis; GABABR-E, anti-gamma aminobutyric acid-B receptor encephalitis; QAlb, CSF/serum albumin ratio; ns, not significant statistical. *p <0.05, **p <0.01 and ***p <0.001.


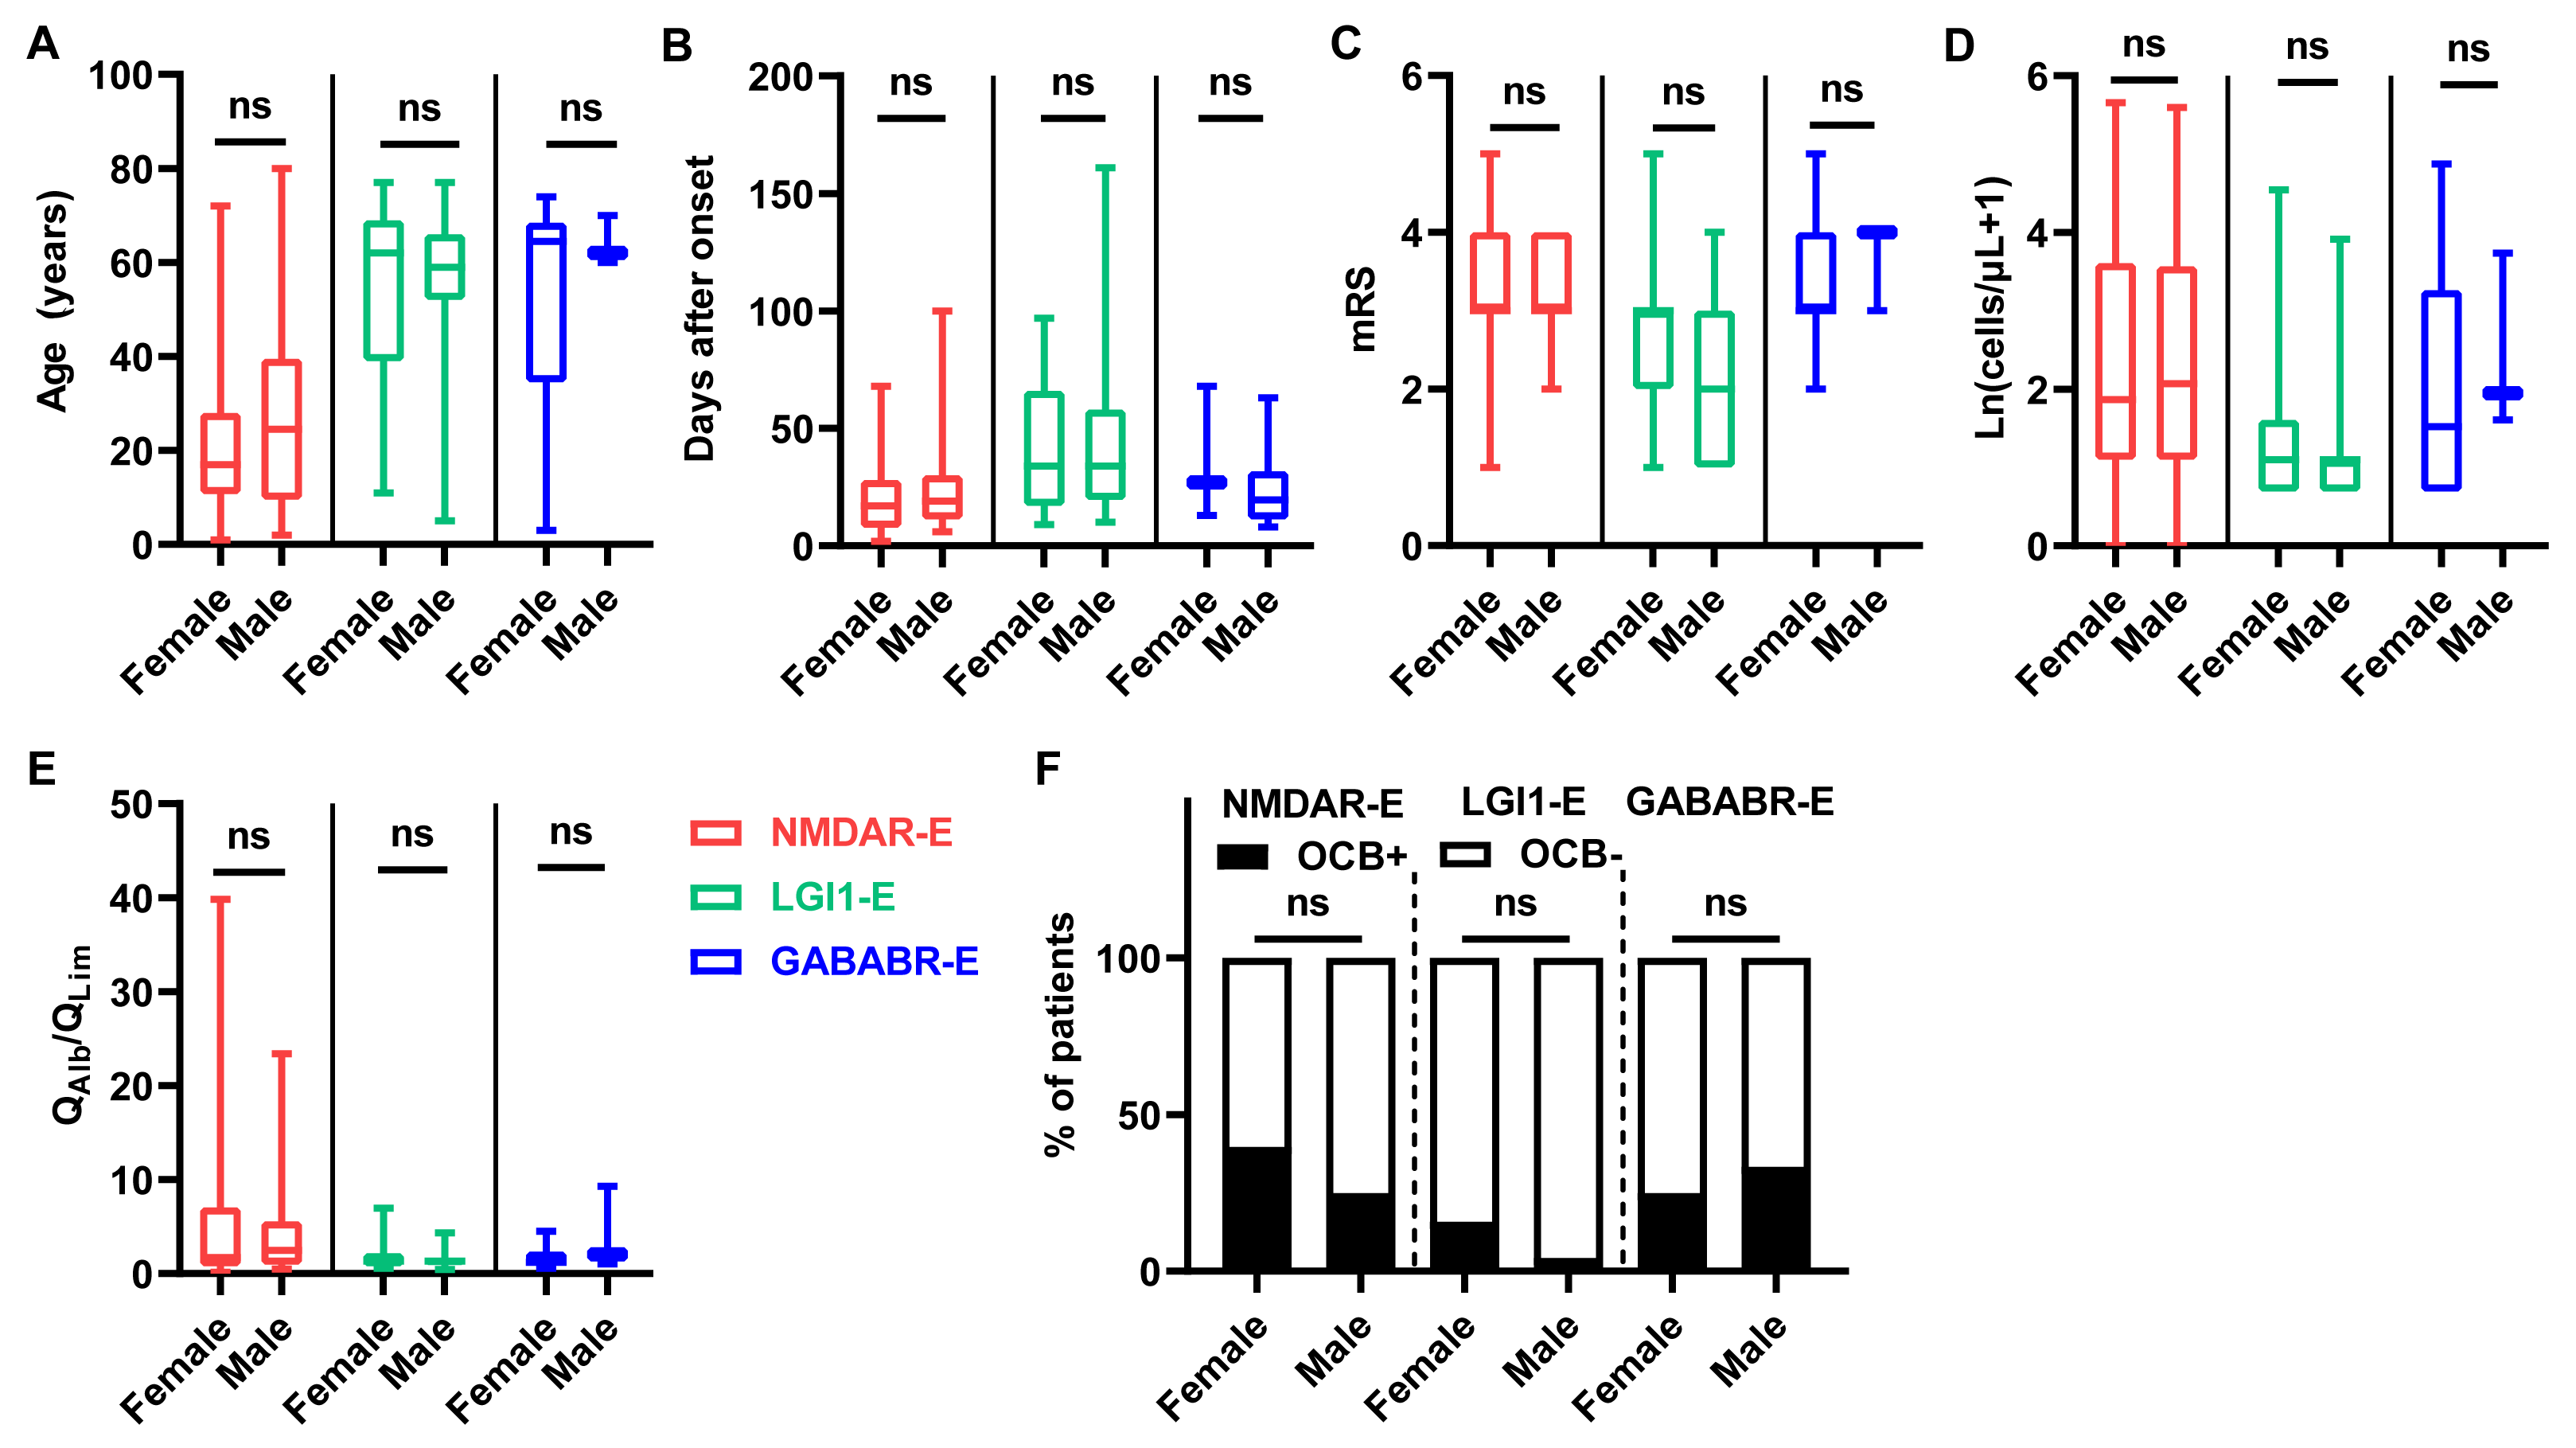


Figure S4. Gender has no effect on the CSF results for NMDAR-E, LGI1-E, or GABABR-E. Patients were divided into two groups based on their gender. Age (A), delay of lumbar puncture in days (B), and the degree of functional impairment as measured by the modified Rankin scale (mRS) (C) in female patients with NMDAR-E, LGI1-E, and GABABR-E, compared to male patients, were depicted. CSF findings for CSF leukocyte count represented as logarithmized cell counts after adding a correction factor of 1 (Ln(cells/μL+1), D), age-adjusted blood-CSF barrier function as QAlb/Qlim (E), and relative frequency of oligoclonal IgG restricted to the CSF (OCB+, F). NMDAR-E, anti-N-methyl-D-aspartate receptor encephalitis; LGI1-E, anti-leucine-rich glioma-inactivated 1 encephalitis; GABABR-E, anti-gamma aminobutyric acid-B receptor encephalitis; QAlb, CSF/serum albumin ratio; ns, not significant statistical.


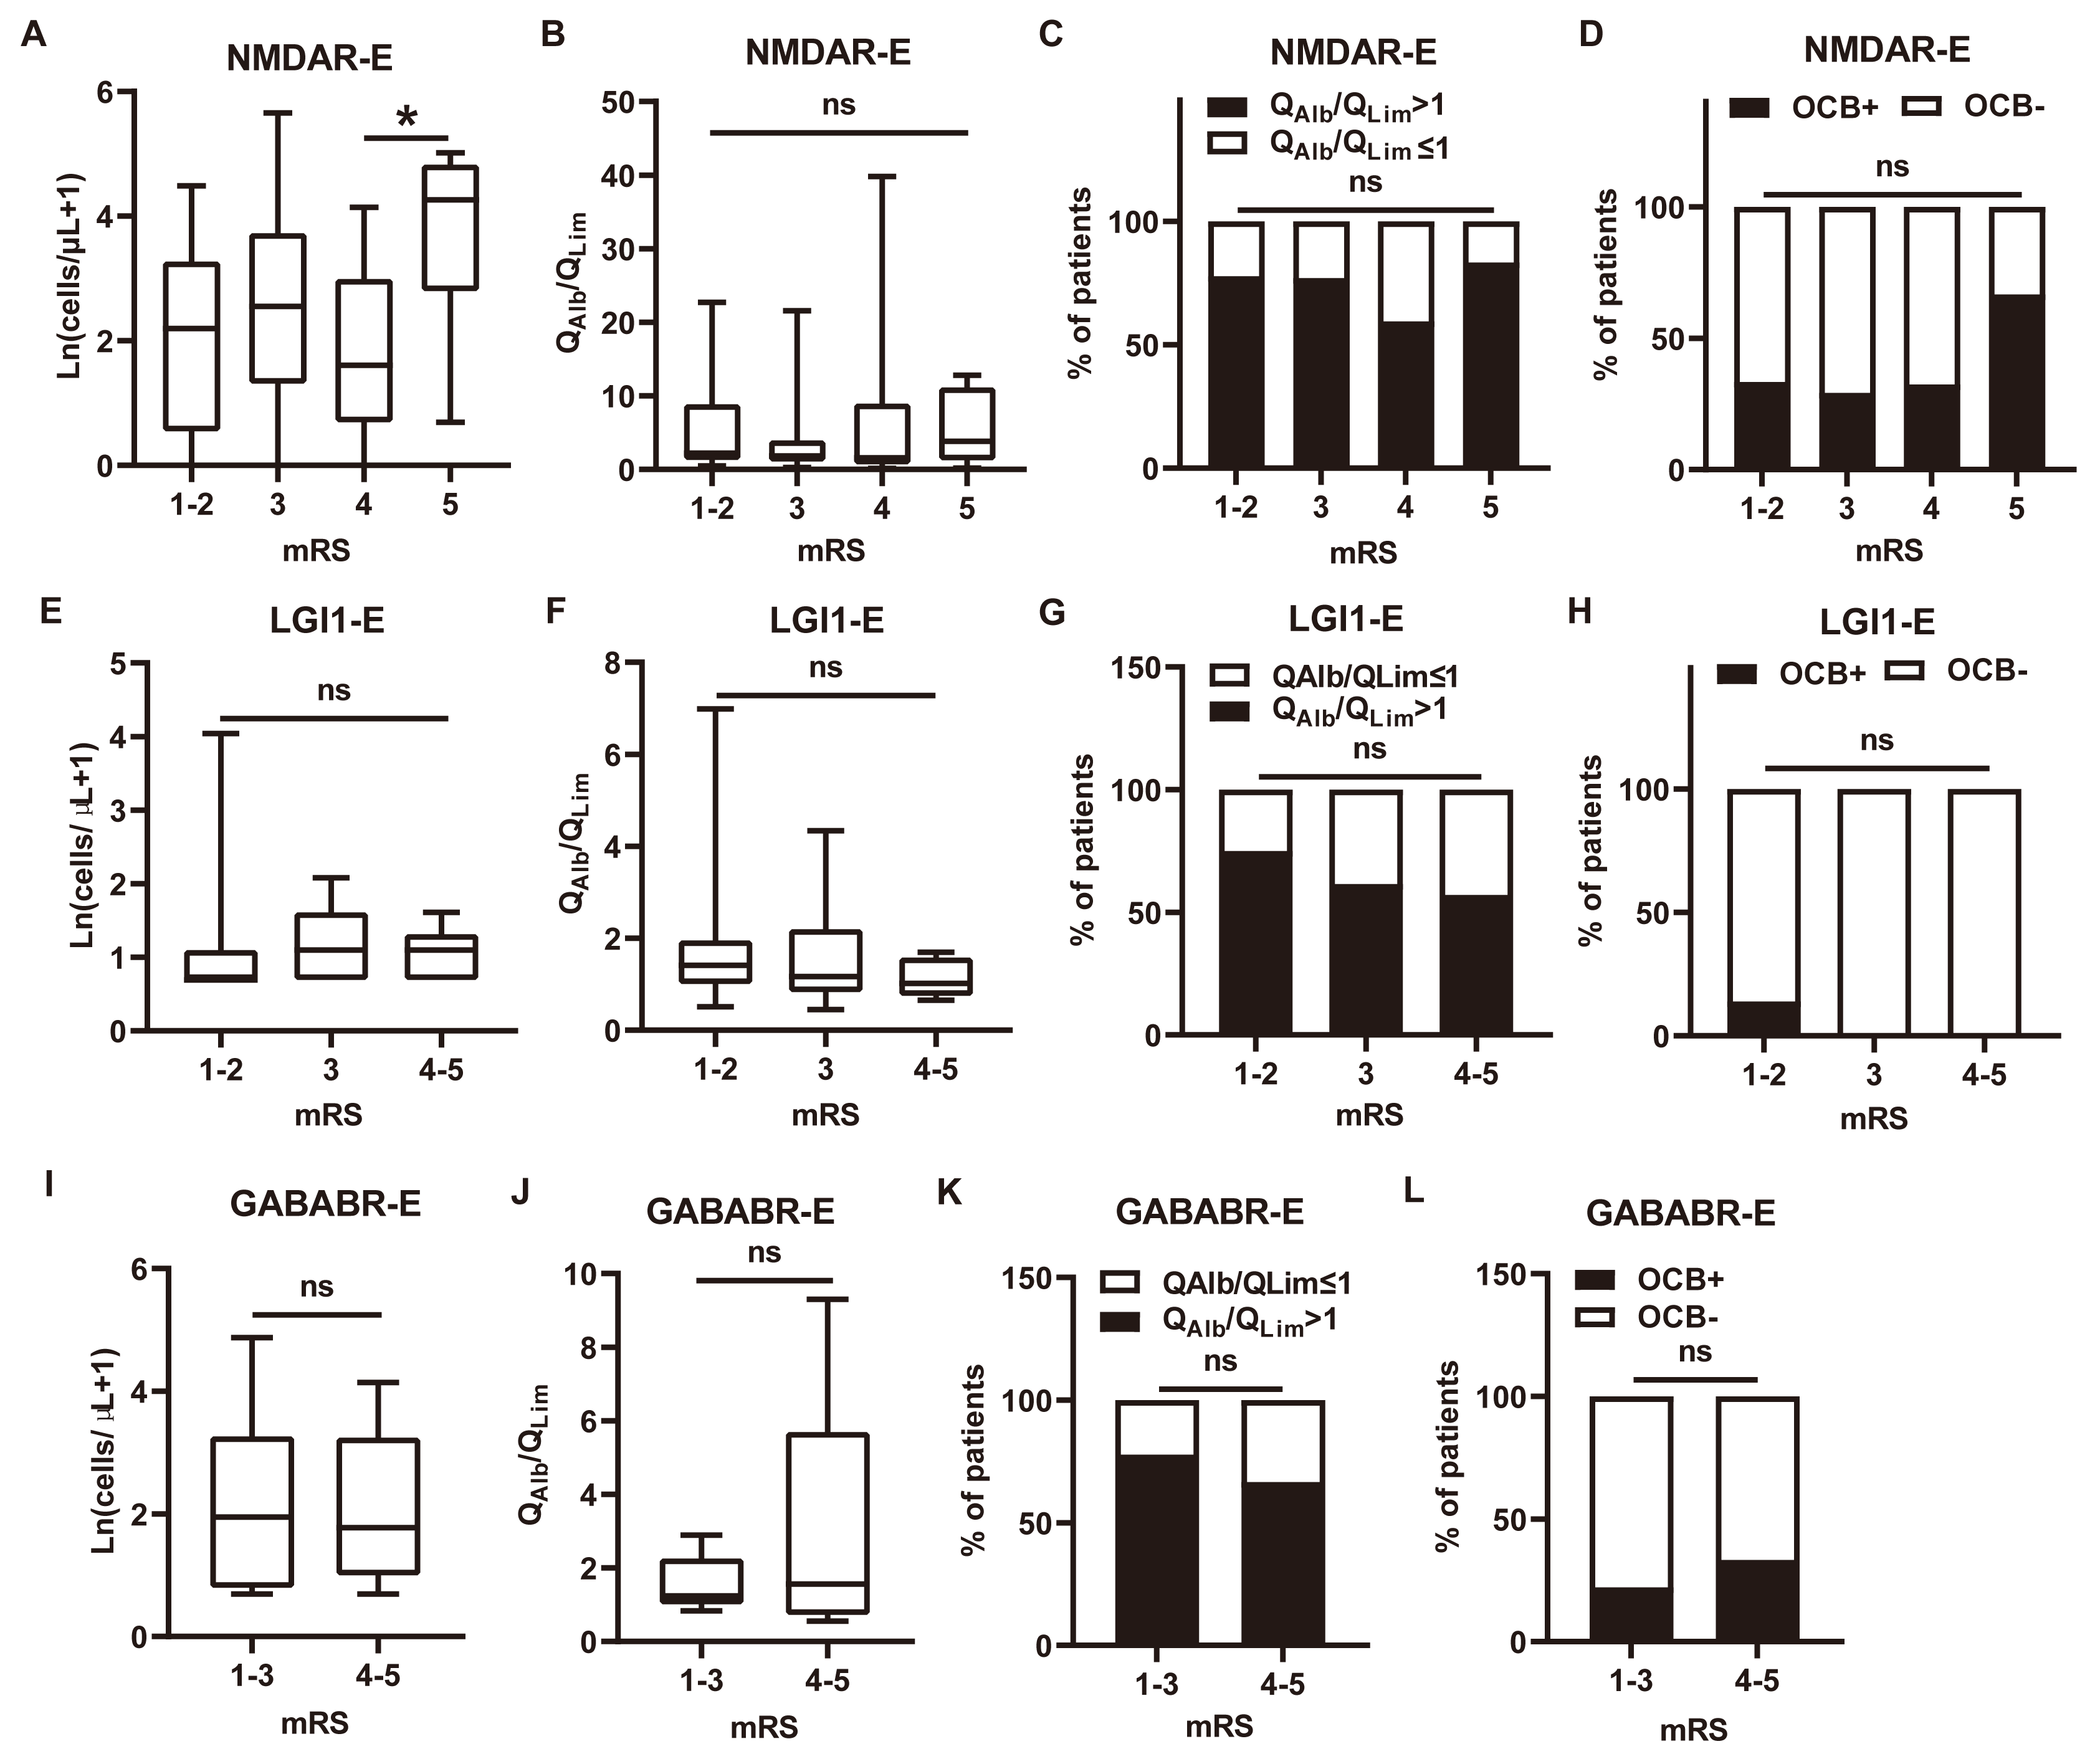


Figure S5. The analyses of the relationship between functional impairment at the time of lumbar puncture and inflammatory CSF alterations in NMDAR-E, LGI1-E, and GABABR-E. In NMDAR-E, (A) the patients with mRS score of 4 had a lower CSF leukocyte count than those with mRS score of 5; blood-CSF barrier function (B,C) and CSF-restricted OCBs (D) were not significantly different between groups with mRS scores of 1-2, 3, 4, and 5. In LGI1-E, no difference was found in CSF leukocyte count (E), blood-CSF barrier dysfunction (F, G) and CSF-restricted OCBs (H) in the patient cohort with either mRS of 1-2, 3, 4-5. In GABABR-E, there is no significant difference in CSF leukocyte count (I), blood-CSF barrier dysfunction (J, K), or CSF-restricted OCBs (L) between the patient cohorts with mRS 1-3 and 4-5. NMDAR-E, anti-N-methyl-D-aspartate receptor encephalitis; LGI1-E, anti-leucine-rich glioma-inactivated 1 encephalitis; GABABR-E, anti-gamma aminobutyric acid-B receptor encephalitis; QAlb, CSF/serum albumin ratio; mRS, modified Rankin scale; ns, not significant. *p <0.05.


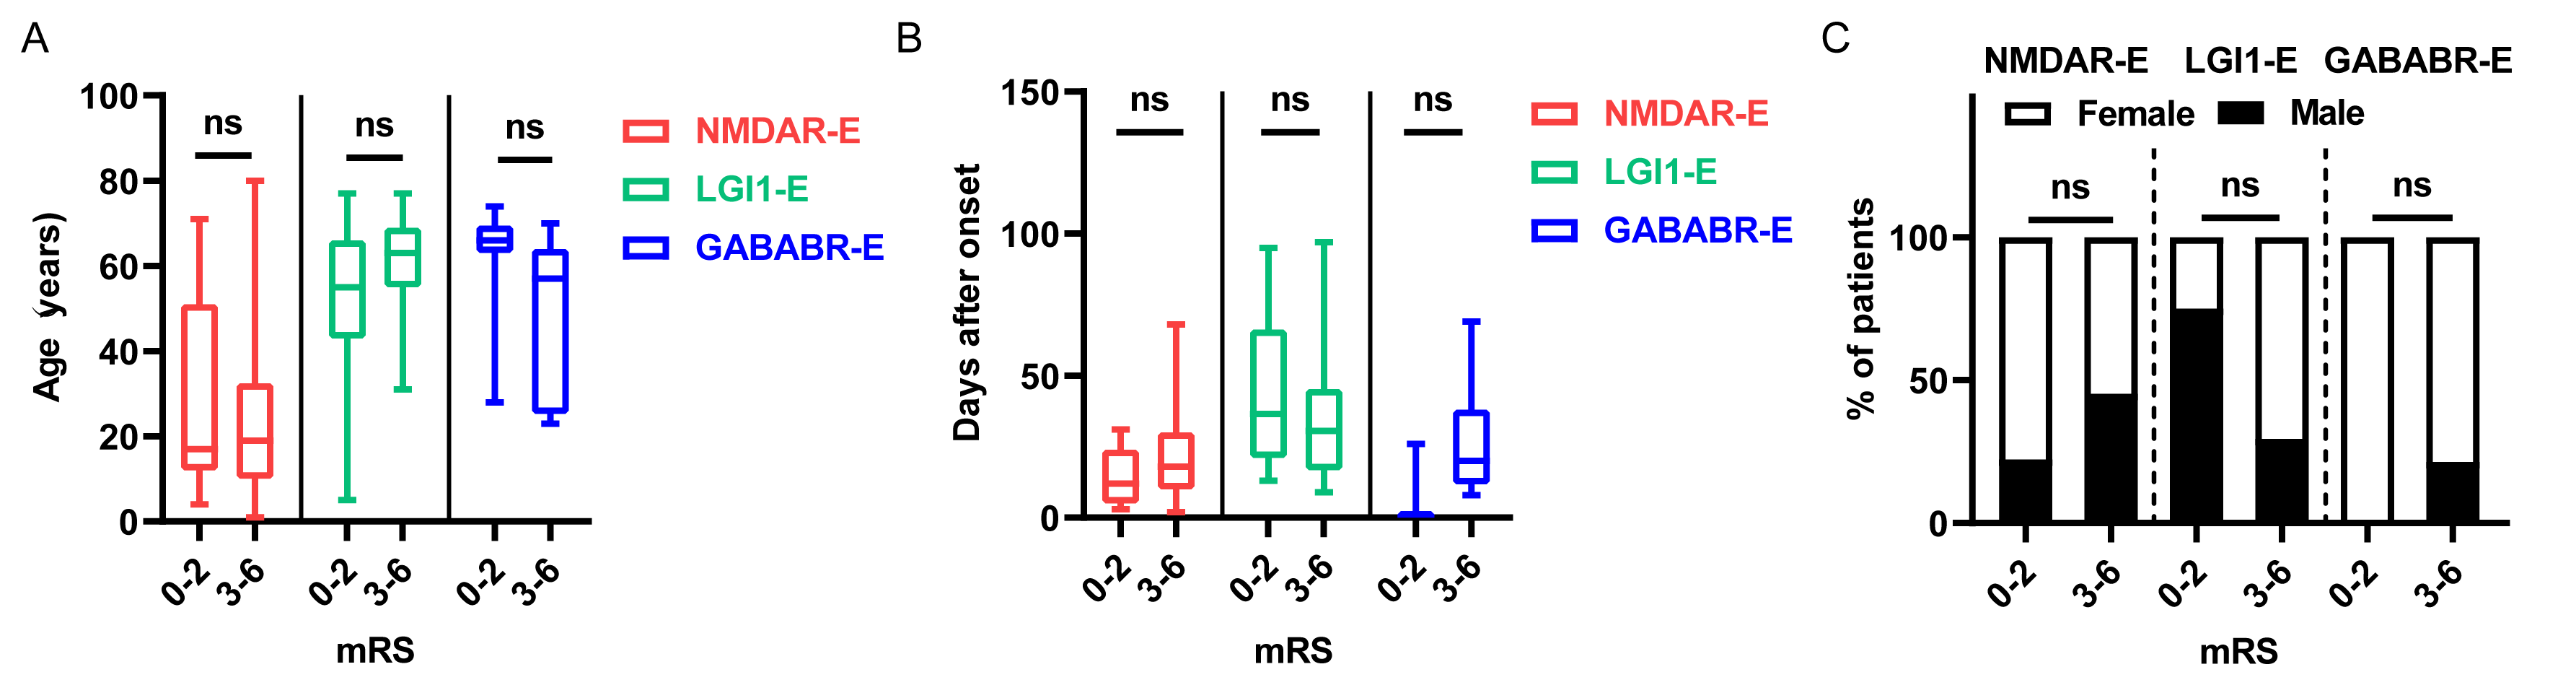


Figure S6. Additional analyses of the influence of functional impairment on clinical features of NMDAR-E, LGI1-E, and GABABR-E. Age (A), lumbar puncture time (B), and gender distribution (C) did not significantly differ between NMDAR-E, LGI1-E, and GABABR-E patients with mild functional impairment (mRS score 0-2) and those with severe functional impairment (mRS score 3-5). NMDAR-E, anti-N-methyl-D-aspartate receptor encephalitis; LGI1-E, anti-leucine-rich glioma-inactivated 1 encephalitis; GABABR-E, anti-gamma aminobutyric acid-B receptor encephalitis; mRS, modified Rankin scale; ns, not significant statistical.


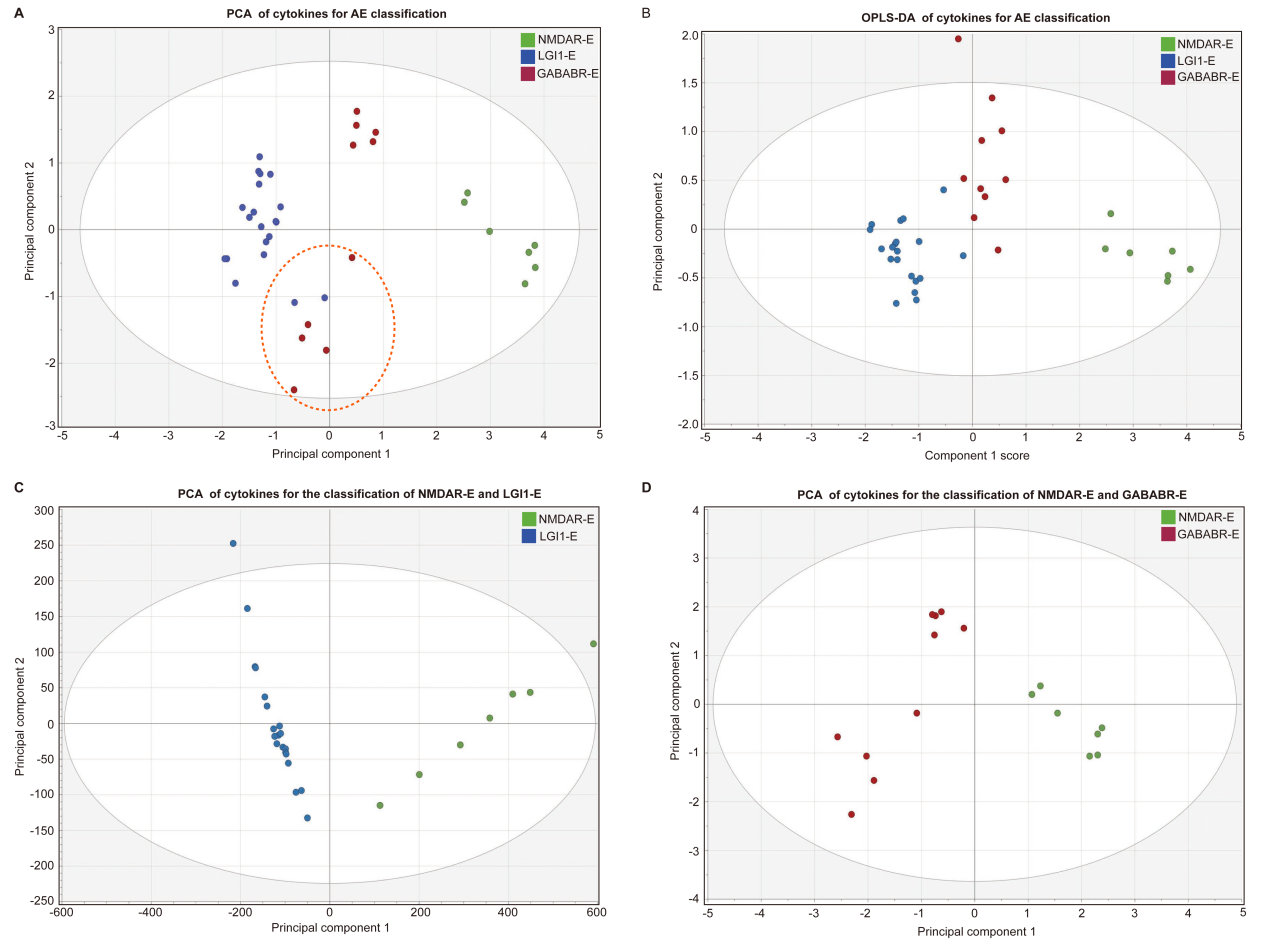


Figure S7. Using PCA and OPLS-DA, cytokine analysis revealed a discriminant model of NMDAR-E, LGI1-E, and GABABR-E. (A) PCA model for the three AE subgroups based on each patient's ten cytokine profile. As depicted by the red circles with dashes, five GABABR-E patients were grouped with two LGI1-E patients. (B) OPLS-DA model for the three AE subgroups, utilizing an analysis of 10 cytokines for each patient. (C) and (D) PCA models for classifying NMDAR-E relative to LGI1-E and NMDAR-E relative to GABABR-E, respectively. PCA, principal component analysis; OPLS-DA, orthogonal partial least squares discriminant analysis; AE, autoimmune encephalitis; NMDAR-E, anti-N-methyl-D-aspartate receptor encephalitis; LGI1-E, anti-leucine-rich glioma-inactivated 1 encephalitis; GABABR-E, anti-gamma aminobutyric acid-B receptor encephalitis.


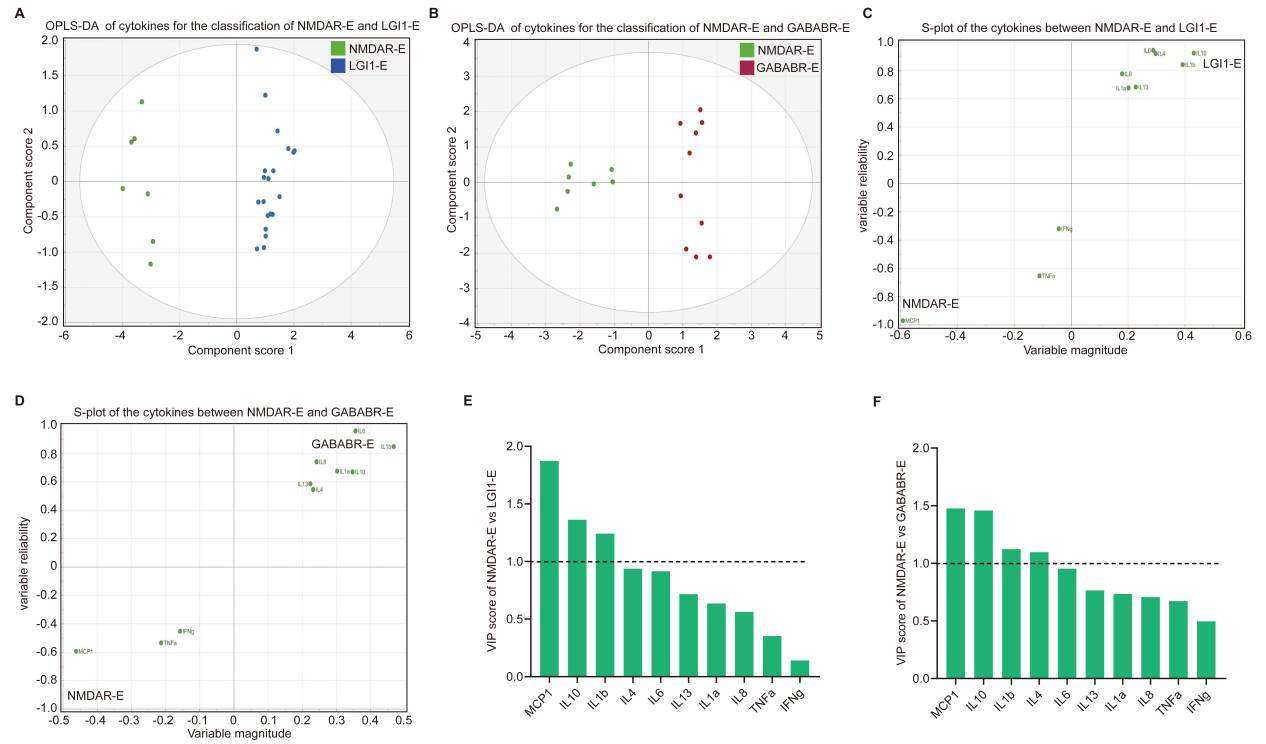


Figure S8. Cytokines discriminator by OPLS-DA between NMDAR-E, LGI1-E and GABABR-E. (A) and (B) OPLS-DA scores plot showed separation of the patients with NMDAR-E from the patients with LGI1-E, and the patients with NMDAR-E from the patients with GABABR-E based on 10 cytokines profile of each patient. (C) and (D) The cytokine classifiers for NMDAR-E vs. LGI1-E and NMDAR-E vs. GABABR-E were found using an S-plot. (E) and (F) The VIP scores of ten cytokines were compared between NMDAR-E and LGI1-E and between NMDAR-E and GABABR-E.

| TableS1 Clinical data in the patients with NMDAR-E, LGI1-E and GABABR-E | | | |
| --- | --- | --- | --- |
|  | NMDAR-E | LGI1-E | GABABR-E |
| Number of patients | 102 | 68 | 15 |
| Female, No.(%) | 58 (56.86) | 19 (27.94) | 3 (20.00) |
| Age, median(range), years | 18.00 (10.50-33.50) | 59.50 (52.00-67.75) | 64.00 (54.00-69.00) |
| Prodromal symptom, No.(%) | 17 (16.70) | 3 (4.40) | 0 (0.0) |
| Tumor comorbidity (teratoma), No.(%) | 10 (9.80) | 0 (0.0) | 0 (0.0) |
| Concomitant anbody |  |  |  |
| Anti-ANA antibody, No.(%) | 13 (12.70) | 8 (11.80) | 2 (13.30) |
| Anti-PR3 antibody, No.(%) | 1 (1.0) | 1 (1.5) | 0 (0.0) |
| Anti-GPI antibody, No.(%) | 2 (2.0) | 0 (0.0) | 0 (0.0) |
| Anti-mitochondria M2 antibody, No.(%) | 1 (1.0) | 0 (0.0) | 0 (0.0) |
| Anti-SM antibody, No.(%) | 1 (1.0) | 0 (0.0) | 0 (0.0) |
| Anti-GBS antibody, No.(%) | 1 (1.0) | 0 (0.0) | 0 (0.0) |
| Anti-cardiolipin antibody, No.(%) | 2 (2.0) | 2 （2.9） | 0 (0.0) |
| Anti-SSA antibody, No.(%) | 2 (2.0) | 0 (0.0) | 0 (0.0) |
| Rheumatoid factors, No.(%) | 1 (1.0) | 1 (1.5) | 0 (0.0) |
| Anti-PMSCL antibody, No.(%) | 1 (1.0) | 0 (0.0) | 0 (0.0) |
| Paraneoplastic antibody, No.(%) | 3 （2.90） | 0 (0.0) | 2 (13.30) |
| Clinical manifestation |  |  |  |
| Mental behavior disorder, No.(%) | 77 (75.50) | 42 (61.80) | 11 (73.30) |
| Cognitive impairment, No.(%) | 72 (70.59) | 36 (52.94) | 11 (73.30) |
| Disturbance of consciousness, No.(%) | 55 (53.92) | 16 (23.53) | 8 (53.30) |
| Seizure, No.(%) | 75 (73.53) | 59 (86.80) | 15 (100.0) |
| FBDS, No.(%) | 17 (16.70) | 19 (27.90) | 0 (0.0) |
| Autonomicnerve symptom, No.(%) | 28 (27.45) | 5 (7.35) | 2 (13.30) |
| Central hypoventilation, No.(%) | 19 (18.60) | 0 (0.0) | 8 (53.30) |
| Hyponatremia, No.(%) | 18 (17.65) | 38 (55.88) | 1 (6.67) |
| CSF test |  |  |  |
| CSF cell number, median (range), cells/uL | 6 (2-36) | 2 (1-2) | 5 (1-16) |
| CSF protein, median (range), g/L | 0.30 (0.17-0.59) | 0.39 (0.28-0.55) | 0.45 (0.32-0.72) |
| OCBs, No.(%) | 35 (34.31) | 5 (7.35) | 4 (26.67) |
| CSFIgG, median (range), mg/L | 30.90 (16.95-56.40) | 33.50 (21.50-53.85) | 39.45 (32.98-73.43) |
| CSFIgA, median (range), mg/L | 2.58 (1.56-7.47) | 3.93 (2.55-7.48) | 4.74 (2.04-10.98) |
| CSFIgM, median (range), mg/L | 0.49 (0.24-2.21) | 0.33 (0.17-0.58) | 0.97 (0.46-2.73) |
| NMDAR-E,anti-N-methyl-D-aspartate receptor encephalitis; LGI1-E, anti-leucine-rich glioma-inactivated 1 encephalitis; GABABR-E, anti-gamma aminobutyric acid-B receptor encephalitis;FBDS,faciobrachial dystonic seizure;CSF,Cerebrospinal Fluid;OCBs,oligoclonal bands; FBDS, Faciobrachial dystonic seizures. | | | |

| TableS2 Binary logistic regression analysis of potential predictor of LGI1-E (LGI1-E vs NMDAR-E) | | | | |
| --- | --- | --- | --- | --- |
|  | Univariate analysis | | Multivariate analysis | |
| Variable | OR (95% CI) | P value | OR (95% CI) | P value |
| Days of LP from onset | 1.041 (1.022-1.061) | <0.001 | 1.033 (1.003-1.064) | 0.031 |
| Age at onset | 1.092 (1.066-1.118) | <0.001 | 1.086 (1.056-1.123) | <0.001 |
| mRS≥3 on admission |  |  |  |  |
| Yes | 0.099 (0.043-0.228) | <0.001 | 0.062 (0.015-0.268) | <0.001 |
| No | Ref. |  | Ref. |  |
| CSF Cell number, Ln(x+1) | 0.471 (0.341-0.649) | <0.001 | 0.409 (0.230-0.727) | 0.002 |
| QAlb/Qlim | 0.733 (0.606-0.886) | 0.001 | 0.721 (0.549-0.947) | 0.019 |
| OCBs |  |  |  |  |
| Yes | 0.159 (0.058-0.431) | <0.001 | － | － |
| No | Ref. |  | Ref. |  |
| NMDAR-E,anti-N-methyl-D-aspartate receptor encephalitis; LGI1-E, anti-leucine-rich glioma-inactivated 1 encephalitis; GABABR-E, anti-gamma aminobutyric acid-B receptor encephalitis;FBDS,faciobrachial dystonic seizure;CSF,Cerebrospinal Fluid;OCBs,oligoclonal bands;LP,lumbar puncture; mRS,Modified Rankin Scale; QAlb/Qlim, age-adjust QAlb. | | | | |

| TableS3 Multivariate logistic regression analysis of potential predictor in AE subtypes | | | | | | | | |
| --- | --- | --- | --- | --- | --- | --- | --- | --- |
|  | GABABR-E vs. NMDAR-E | | | | GABABR-E vs. LGI1-E | | | |
|  | Univariate analysis | | Multivariate analysis | | Univariate analysis | | Multivariate analysis | |
| Variable | OR (95% CI) | P value | OR (95% CI) | P value | OR (95% CI) | P value | OR (95% CI) | P value |
| Days of LP from onset | 0.990 （0.978-1.002） | 0.111 | 0.996 (0.984-1.008) | 0.522 | 1.008 （0.997-1.018） | 0.157 | 1.018 (1.005-1.032) | 0.008 |
| Age at onset | 0.922 （0.891-0.955） | <0.001 | 0.927 (0.895-0.960) | <0.001 | 1.003 （0.970-1.038） | 0.85 | 1.020 (0.977-1.064) | 0.377 |
| mRS≥3 at LP |  |  |  |  |  |  |  |  |
| No | 1.385 (0.163-11.783) | 0.766 | 1.951 (0.183-20.806) | 0.580 | 14.000 (1.743-112.478) | 0.013 | 43.640 (3.487-546.125) | 0.003 |
| Yes | Ref. |  | Ref. |  | Ref. |  | Ref. |  |
| CSF Cell number, Ln(x+1) | 1.098 （0.747-1.615） | 0.635 | 1.312 (0.798-2.159) | 0.284 | 0.512 （0.323-0.813） | 0.005 | 0.260 (0.113-0.595) | 0.001 |
| QAlb/Qlim | 1.158 （0.942-1.424） | 0.164 | 1.128 (0.860-1.479) | 0.385 | 0.845 （0.647-1.103） | 0.215 | 0.814 (0.562-1.179) | 0.276 |
| OCBs |  |  |  |  |  |  |  |  |
| No | 0.727 (0.216-2.454) | 0.608 | 0.594 (0.137-2.577) | 0.487 | 4.582 (1.061-19.778) | 0.041 | 9.861 (0.696-139.628) | 0.091 |
| Yes | Ref. |  | Ref. |  | Ref. |  | Ref. |  |
| NMDAR-E,anti-N-methyl-D-aspartate receptor encephalitis; LGI1-E, anti-leucine-rich glioma-inactivated 1 encephalitis; GABABR-E, anti-gamma aminobutyric acid-B receptor encephalitis;FBDS,faciobrachial dystonic seizure;CSF,Cerebrospinal Fluid;OCBs,oligoclonal bands;LP,lumbar puncture; mRS,Modified Rankin Scale; QAlb/Qlim, age-adjust QAlb. | | | | | | | | |
